# Supplementary material for: Twin-like ternary PtCoFe alloy in nitrogen-doped graphene nanopores as a highly effective electrocatalyst for oxygen reduction
Source: Royal Society of Chemistry journal article supplement (doi:10.1039/c6cy00545d), 2016-01-01
Supplement: c6cy00545d1.pdf [file c6cy00545d1.pdf]

## Electronic Supplementary Information

### Twin-like Ternary PtCoFe alloy in Nitrogen-doped Graphene Nanopores as a Highly Effective Electrocatalyst for Oxygen Reduction

Xing Zhong,<sup>a</sup> Wenlei Xu,<sup>a</sup> lei Wang,<sup>a</sup> Yingying Qin,<sup>a</sup> Guilin Zhuang,<sup>a</sup> Xiaonian Li,<sup>a</sup> Jianguo Wang<sup>\*a</sup>

#### Supplementary Results

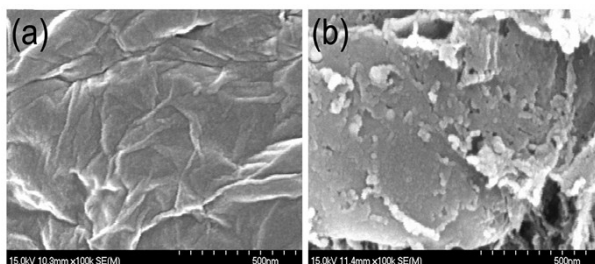

**Figure S1.** (a) SEM image of pristine graphene. Scale bar is 500 nm. (b) SEM image of PtCoFe/NPG 700. Scale bar is 500 nm.

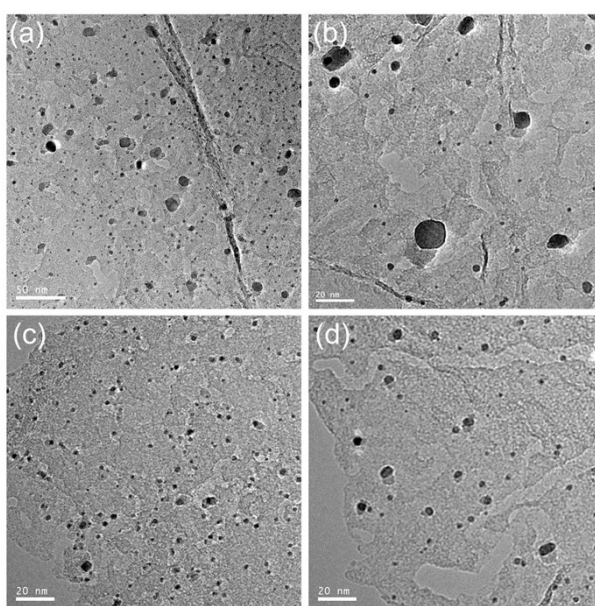

**Figure S2.** (a-b) TEM image of PtCoFe/NPG 700. Scale bars in (a) and (b) is 50 nm and 20 nm, respectively. (c) TEM image of PtNiFe/NPG. Scale bar is 20 nm. (d) TEM image of PtCoNi/NPG. Scale bar is 20 nm.

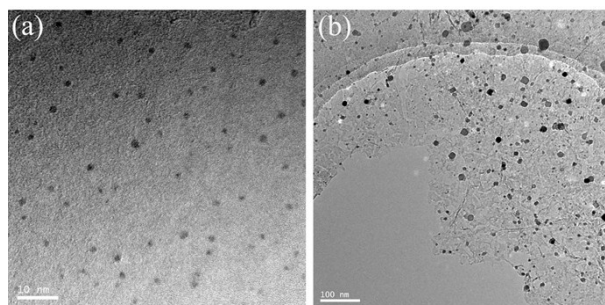

**Figure S3.** (a) TEM images of PtCoFe/NPG 600. Scale bar is 10 nm. (b) TEM images of PtCoFe/NPG 800. Scale bar is 100 nm.

**Table S1:** The calculated species concentrations (atomic %) of different atoms in G, PtCoFe/NPG 600, PtCoFe/NPG 700 and PtCoFe/NPG 800 based XPS results.

|                | %C    | %N   | %O   | %Pt  | %Co  | %Fe  |
|----------------|-------|------|------|------|------|------|
| G              | 95.43 | 0.06 | 0.05 | -    | -    | -    |
| PtCoFe/NPG 600 | 85.76 | 7.74 | 4.66 | 0.58 | 0.66 | 0.59 |
| PtCoFe/NPG 700 | 89.88 | 5.25 | 3.42 | 0.6  | 0.42 | 0.43 |
| PtCoFe/NPG 800 | 91.81 | 3.56 | 3.13 | 0.58 | 0.39 | 0.52 |
| Pt/NPG 700     | 94.43 | 1.04 | 3.63 | 0.9  | -    | -    |

**Table S2:** The calculated species concentrations (atomic %) of different atoms in PtFeCu/NPG.

|            | %C    | %N   | %O   | %Pt  | %Cu | %Fe  |
|------------|-------|------|------|------|-----|------|
| PtFeCu/NPG | 89.48 | 4.56 | 4.35 | 0.66 | 0.3 | 0.64 |

**Table S3:** The calculated species concentrations (atomic %) of different atoms in PtFeNi/NPG.

|            | %C   | %N   | %O   | %Pt  | %Ni  | %Fe  |
|------------|------|------|------|------|------|------|
| PtFeNi/NPG | 89.1 | 4.31 | 5.05 | 0.62 | 0.47 | 0.46 |

**Table S4:** The calculated species concentrations (atomic %) of different atoms in PtNiCo/NPG.

|            | %C   | %N   | %O   | %Pt  | %Ni  | %Co  |
|------------|------|------|------|------|------|------|
| PtNiCo/NPG | 88.5 | 5.47 | 4.53 | 0.58 | 0.48 | 0.44 |

**Table S5:** The calculated species concentrations (atomic %) of different atoms in PtNiCu/NPG.

|            | %C    | %N  | %O   | %Pt  | %Ni  | %Cu  |
|------------|-------|-----|------|------|------|------|
| PtNiCu/NPG | 89.73 | 4.8 | 4.24 | 0.58 | 0.43 | 0.23 |

**Table S6:** Relative ratios of the deconvoluted peak areas of the N 1s XPS spectra.

|                | Pyridinic N | N-M   | Pyrrolic N | Graphitic N | N <sup>+</sup> -O <sup>-</sup> |
|----------------|-------------|-------|------------|-------------|--------------------------------|
| PtCoFe/NPG 600 | 64.45       | -     | 21.75      | 13.8        | -                              |
| PtCoFe/NPG 700 | 42.05       | 28.17 | 18.98      | 8.93        | 1.87                           |
| PtCoFe/NPG 800 | 23.12       | 28.48 | 27.3       | 14.56       | 6.54                           |
| Pt/NPG 700     | 36.72       | -     | 38.66      | 15.04       | 9.58                           |
| G              | 61.45       | -     | 16.92      | 16.1        | 5.54                           |

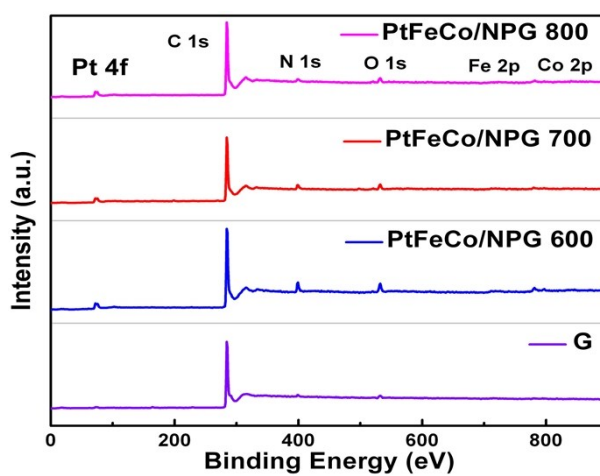

**Figure S4.** XPS survey spectra of PtCoFe/NPG 800, PtCoFe/NPG 700, PtCoFe/NPG 600 and G.

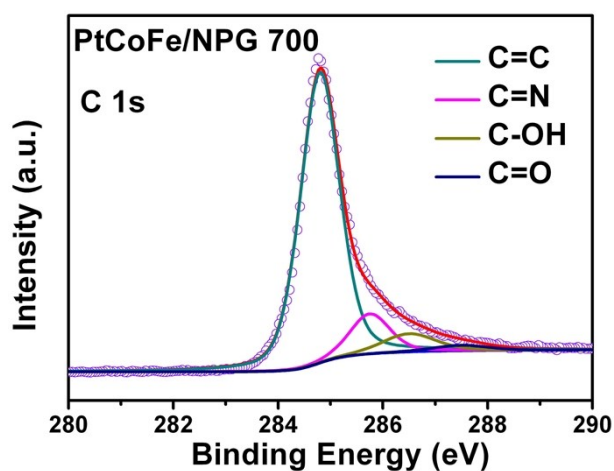

Figure S5. The high-resolution C1s XPS spectra of PtCoFe/NPG 700.

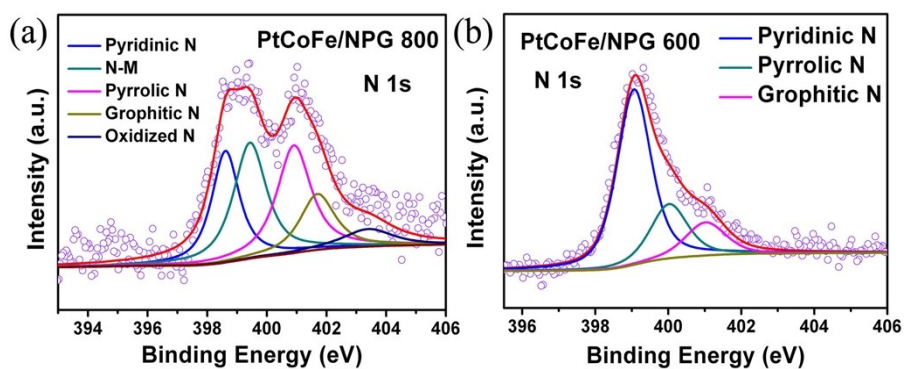

Figure S6. The high resolution N1s XPS spectra of (a) PtCoFe/NPG 800 and (b) PtCoFe/NPG 600.

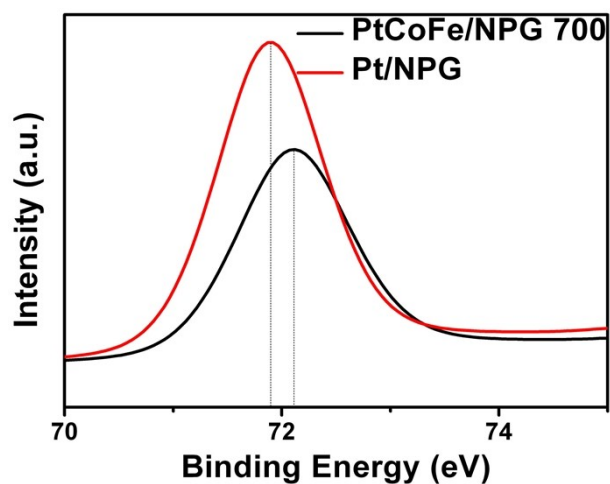

**Figure S7.** Comparison of the sub-spectra of Pt  $4f_{7/2}$  corresponding to Pt<sup>0</sup> entities for PtCoFe/NPG 700 and Pt/NPG.

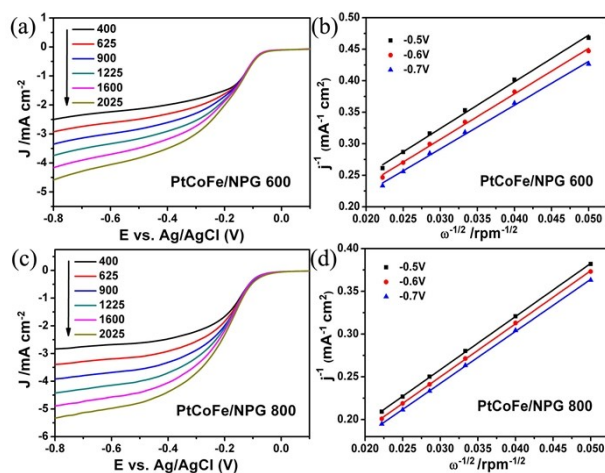

**Figure S8.** LSV of (a) PtCoFe/NPG 600, (c) PtCoFe/NPG 800 on RDE at different rotating rates (400 to 2,025 rpm). Corresponding Koutecky–Levich plot of (b) PtCoFe/NPG 600, (d) PtCoFe/NPG 800 at different potentials.

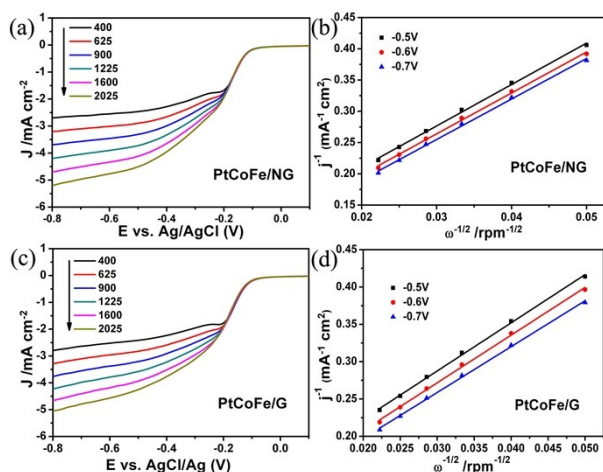

**Figure S9.** LSV of (a) PtCoFe/NG, (c) PtCoFe/G on RDE at different rotating rates (400 to 2,025 rpm). Corresponding Koutecky–Levich plot of (b) PtCoFe/NG, (d) PtCoFe/G at different potentials.

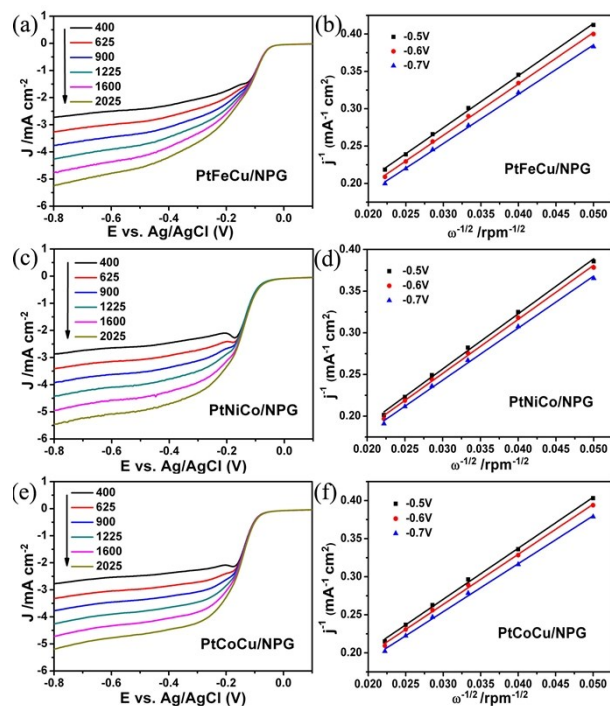

**Figure S10.** LSV of (a) PtFeCu/NPG, (c) PtNiCo/NPG, (e) PtCoCu/NPG on RDE at different rotating rates (400 to 2025 rpm). Corresponding Koutecky-Levich plot of (b) PtFeCu/NPG, (d) PtNiCo/NPG, (f) PtCoCu/NPG at different potentials.

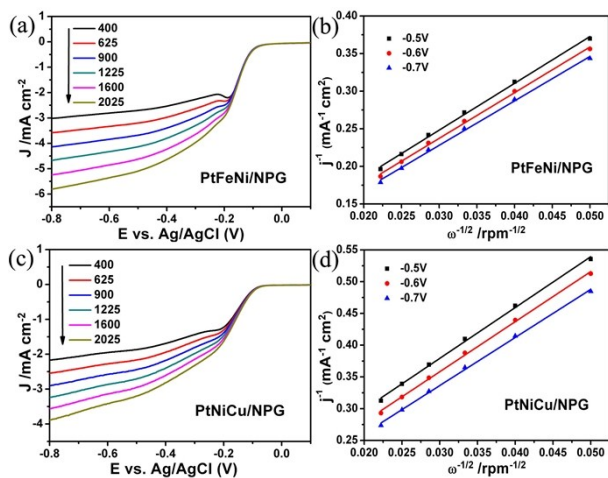

**Figure S11.** LSV of (a) PtFeNi/NPG, (c) PtNiCu/NPG on RDE at different rotating rates (400 to 2025 rpm). Corresponding Koutecky-Levich plot of (b) PtFeNi/NPG, (d) PtNiCu/NPG at different potentials.

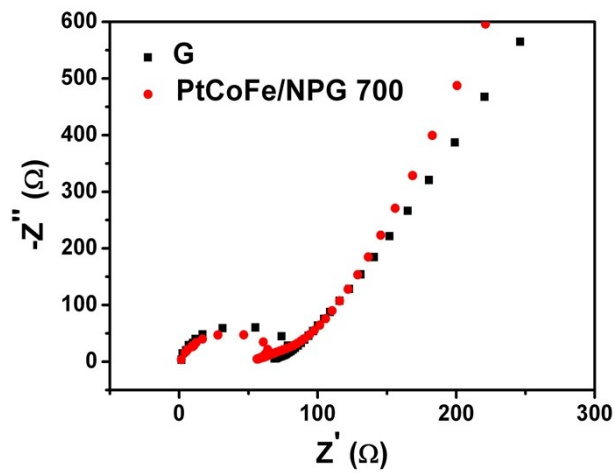

Figure S12. (a) Nyquist curves of G and PtCoFe/NPG 700.

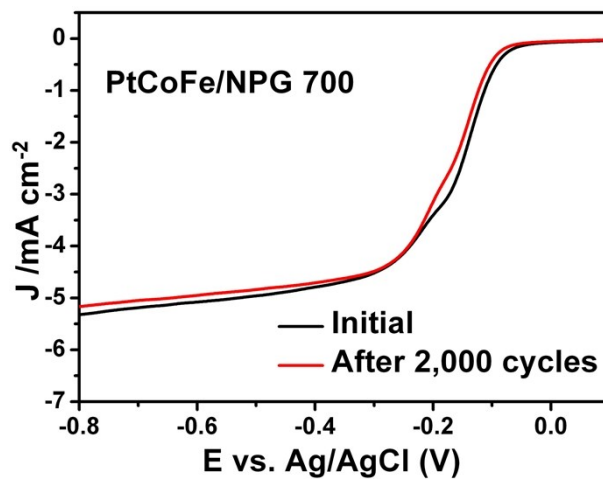

Figure S13. RDE curves of PtCoFe/NPG before and after 2000 cycles on an RDE (1600 rpm) in an  $O_2$ -saturated 0.1 M KOH solution.
